# Supplementary material for: Device parameter to evaluate exciton energy transfer in organic whispering-gallery-mode microresonators and its dependence on the amplified spontaneous emission threshold
Source: Royal Society of Chemistry journal article supplement (doi:10.1039/d3cp05093a), 2023-12-21
Supplement: d3cp05093a1.pdf [file d3cp05093a1.pdf]

Supplementary Information

**Device Parameter to Evaluate Exciton Energy Transfer in Organic Whispering-Gallery-Mode Microresonators and its Dependence on the Amplified Spontaneous Emission Threshold**

Tomoki Mikajiri, Takeshi Komino\*, Jun-ichi Yamada, Hiroyuki Tajima

*Graduate School of Science, University of Hyogo, Ako-gun, Hyogo 678-1297, Japan*

\*Corresponding author. E-mail address: komino@sci.u-hyogo.ac.jp

## Photoluminescence spectra of the 1 wt%-C545T:BSB-Cz doped film

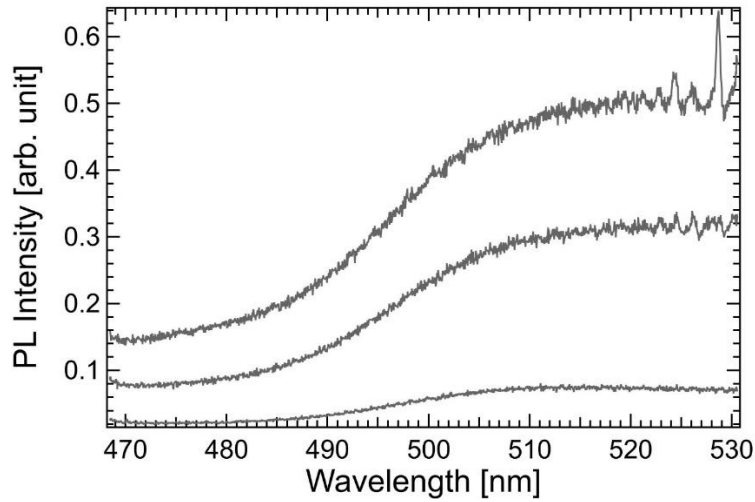

**Figure S1.** Dependence of photoluminescence spectra on the excitation intensity  $I_{ex}$  [(upper)  $I_{ex} = 8.0 \mu J mm^{-2}$ , (middle)  $I_{ex} = 1.6 \mu J mm^{-2}$ , (lower)  $I_{ex} = 0.1 \mu J mm^{-2}$ ].

## The dependence of simulated electric fields on $d_t$

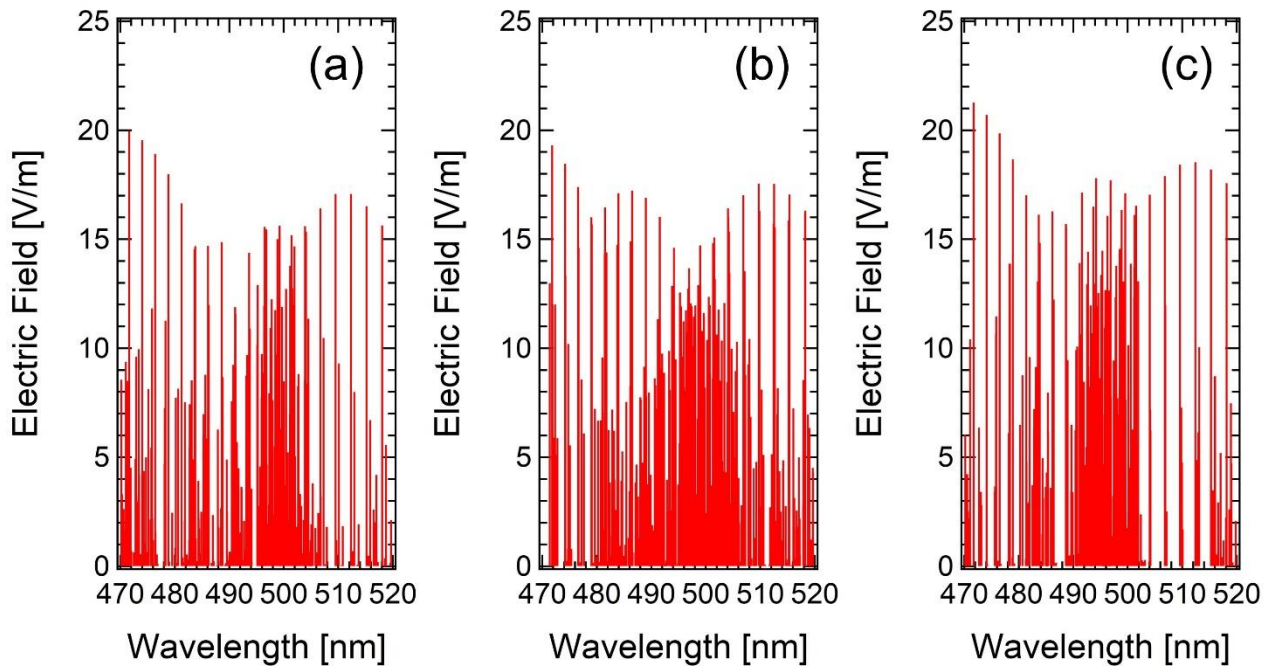

**Figure S2.** Simulated spectra of the electric fields horizontal to the substrates for (a)  $d_t = 124.5$  nm, (b)  $d_t = 70$  nm, and (c)  $d_t = 35$  nm.

## Photoluminescence spectra for $d_u = 2$ and 6 nm

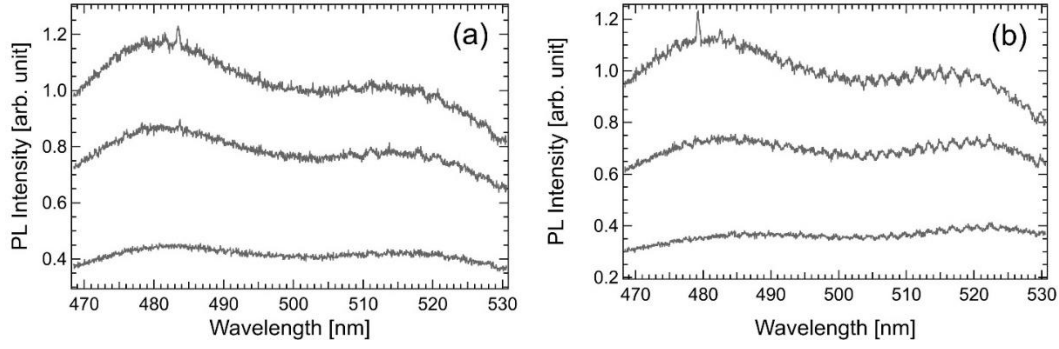

**Figure S3.** Dependence of the photoluminescence spectrum on the excitation intensity ( $I_{ex}$ ) for (a)  $d_{C545T} = 6$  nm [(top)  $I_{ex} = 10 \mu\text{J mm}^{-2}$ , (middle)  $I_{ex} = 4.1 \mu\text{J mm}^{-2}$ , (bottom)  $I_{ex} = 0.8 \mu\text{J mm}^{-2}$ ] and (b)  $d_{C545T} = 2$  nm [(top)  $I_{ex} = 24 \mu\text{J mm}^{-2}$ , (middle)  $I_{ex} = 7.6 \mu\text{J mm}^{-2}$ , (bottom)  $I_{ex} = 0.8 \mu\text{J mm}^{-2}$ ].

## Photoluminescence intensity versus excitation intensity characteristics

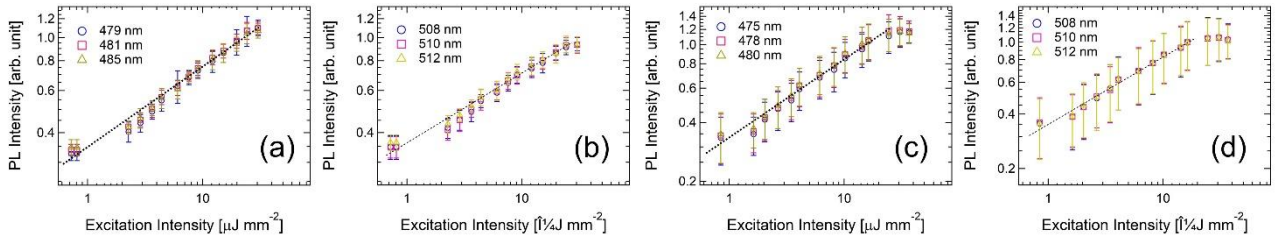

**Figure S4.** Photoluminescence intensity versus excitation intensity characteristics for (a)  $d_{BSB-Cz} = 2$  nm ( $\lambda \sim 480$  nm), (b)  $d_{C545T} = 2$  nm ( $\lambda \sim 510$  nm), (c)  $d_{BSB-Cz} = 6$  nm ( $\lambda \sim 480$  nm), and (d)  $d_{C545T} = 6$  nm ( $\lambda \sim 510$  nm).

**Calculation of the rate constant of the Förster energy transfer.** The rate constant of the Förster energy transfer or fluorescent resonance energy transfer ( $k_{FRET}$ ) is given by  $k_{FRET} =$

$$\frac{9000c^4 \ln 10}{128\pi^5 n^4 N_A \tau r^6} \int f \varepsilon \frac{dv}{v^4},$$

where  $c$  is the velocity of light in vacuum,  $n$  is the refractive index,  $N_A$  is Avogadro's number,  $\tau$  is the radiation lifetime of BSB-Cz,  $k^2$  is the orientation factor (2/3),  $r$  is the distance between the C545T ground-state and BSB-Cz excited-state molecules,  $f$  is the shape function of the PL spectrum for BSB-Cz,  $\varepsilon$  is the molar extinction coefficient of C545T, and  $v$  is the frequency of light. Calculation of  $k_{FRET}$  in the layer-stacked structures is complex because the light absorption intensity depends on the position in the BSB-Cz layers (by extinction of the excitation light intensity in the medium). Thus, we defined the intensity of the Förster energy transfer  $I_{FRET}$  by

$I_{FRET}(t) = \sum I_T(d) \cdot R \exp(-k_{FRET}(d) \cdot t)$ , where  $t$  is time,  $d$  is the distance between the surface of the BSB-Cz top layer and the arbitrary position inside the BSB-Cz top and bottom layers,  $I_T$  is the transmitted intensity of the excitation light, which was obtained by considering the extinction coefficient of the BSB-Cz thin film, and  $R$  is the probability that BSB-Cz absorbs the excitation light at the arbitrary position. In the actual calculation, we used the simplified equation  $I'_{FRET}(t) = \frac{I_{FRET}(t)}{I_0 \cdot R} = \sum \frac{I_T(d)}{I_0} \exp(-k_{FRET}(d) \cdot t)$  to obtain the dimensionless value  $I'_{FRET}(t)$ , where  $I_0$  is the excitation intensity (the value was arbitrarily defined). The step of  $d$  for the calculation was set to 1 nm. In the calculation of  $I'_{FRET}(t)$ ,  $r$  is considered to be the distance between the arbitrary position and the nearest BSB-Cz/C545T interface. The thicknesses of the C545T layers are ignored because they are sufficiently thin with respect to the total thickness. The  $I'_{FRET}(t) - t$  characteristics showed multiexponential decay. We consider that the lifetime of the Förster energy transfer is the time that the  $I'_{FRET}(t)$  value becomes  $1/e$  of the initial value [ $I'_{FRET}(0)$ ], and that  $k_{FRET}$  is the inverse of the lifetime.
